# Supplementary material for: Fabrication of electromagnetic Fe3O4@polyaniline nanofibers with high aspect ratio
Source: Royal Society of Chemistry journal article supplement (doi:10.1039/c4ra14723e), 2015-01-01
Supplement: c4ra14723e1.pdf [file c4ra14723e1.pdf]

## Supporting Information

### Fabrication of Electromagnetic Fe<sub>3</sub>O<sub>4</sub>@Polyaniline Nanofibers with High Aspect Ratio

Yong Ma, Mingtao Qiao, Yanhui Chen, Chunping Hou, Baoliang Zhang, Qiuyu Zhang\*

Key Laboratory of Applied Physics and Chemistry in Space of Ministry of Education, School of Science, Northwestern Polytechnical University, Xi'an 710072, P. R. China

### Characterization

Fourier transform infrared spectra (FTIR) were obtained on a Bruker TENSOR 27 spectrometer. X-ray diffraction patterns (XRD) were got on a Shimadzu XRD-7000S diffractometer with Cu<sub>kα</sub> radiation ( $\lambda=1.548\text{\AA}$ ) from 20° to 80°. X-ray photoelectron spectra (XPS) were gained through a Kratos Axis Ultra DDL spectroscopy.

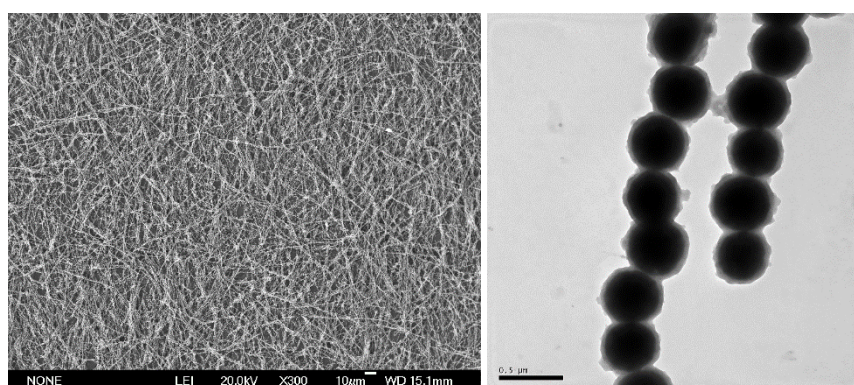

Figure 1. Some representative SEM and TEM images of Fe<sub>3</sub>O<sub>4</sub>@PANI nanofibers.

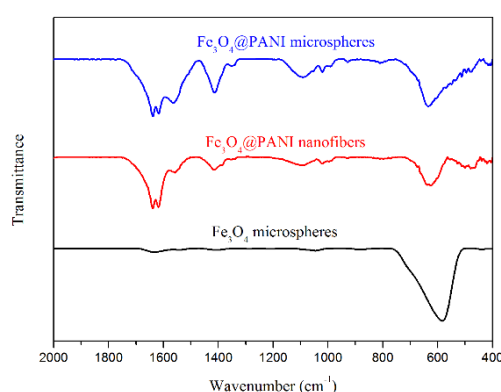

Figure 2. FTIR spectra of Fe<sub>3</sub>O<sub>4</sub> microspheres, Fe<sub>3</sub>O<sub>4</sub>@PANI nanofibers, and Fe<sub>3</sub>O<sub>4</sub>@PANI microspheres.

FTIR spectra of Fe<sub>3</sub>O<sub>4</sub> microspheres, Fe<sub>3</sub>O<sub>4</sub>@PANI nanofibers, and Fe<sub>3</sub>O<sub>4</sub>@PANI

microspheres are shown in figure 2. For  $\text{Fe}_3\text{O}_4$  microspheres, the characteristic absorption peaks present at  $590\text{cm}^{-1}$  assigned to Fe-O vibration. For  $\text{Fe}_3\text{O}_4@\text{PANI}$  nanofibers and  $\text{Fe}_3\text{O}_4@\text{PANI}$  microspheres, the characteristic absorption peaks at 1641, 1621, 1412, 1348, 1095, and  $810\text{ cm}^{-1}$  are related to C=C stretching vibration of quinoid rings and benzenoid rings, C-N stretching, C=N stretching, C-H bending in plane and out of plane in the 1,4-substituted phenyl ring, respectively. The relatively high intensity of a band at  $635\text{cm}^{-1}$  (Fe-O vibration in  $\text{Fe}_3\text{O}_4$ ) in  $\text{Fe}_3\text{O}_4@\text{PANI}$  nanofibers and  $\text{Fe}_3\text{O}_4@\text{PANI}$  microspheres indicates the PANI coating shell is thin, which demonstrates that the PANI coating shell onto the  $\text{Fe}_3\text{O}_4$  microspheres are successfully prepared.

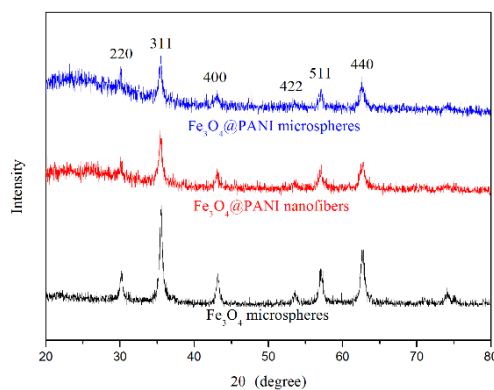

Figure 3. XRD patterns of  $\text{Fe}_3\text{O}_4$  microspheres,  $\text{Fe}_3\text{O}_4@\text{PANI}$  nanofibers, and  $\text{Fe}_3\text{O}_4@\text{PANI}$  microspheres.

Figure 3 shows the XRD patterns of the  $\text{Fe}_3\text{O}_4$  microspheres,  $\text{Fe}_3\text{O}_4@\text{PANI}$  nanofibers, and  $\text{Fe}_3\text{O}_4@\text{PANI}$  microspheres. All detected diffraction peaks ((220) (311) (400) (422) (511) (440)) can be indexed as face centered cubic  $\text{Fe}_3\text{O}_4$  (JCPDS Card No. 19-629). For the  $\text{Fe}_3\text{O}_4@\text{PANI}$  nanofibers and  $\text{Fe}_3\text{O}_4@\text{PANI}$  microspheres, the main peaks of them are the same as those of pristine  $\text{Fe}_3\text{O}_4$  microspheres, which means that the crystal structure of  $\text{Fe}_3\text{O}_4$  microspheres is well-maintained even if they experience the coating process in the acidic solution. Besides, a broad diffraction peak is found from  $20^\circ$  to  $30^\circ$ , which are contributed to the amorphous PANI.

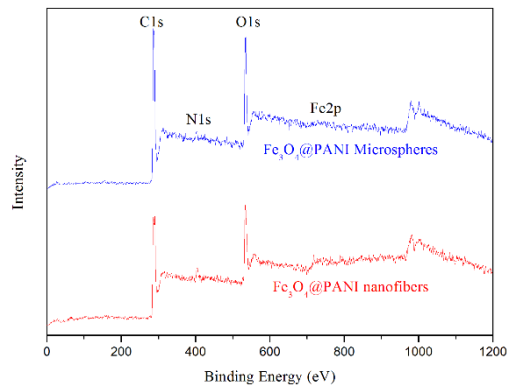

Figure 4. XPS spectra of  $\text{Fe}_3\text{O}_4$ @PANI nanofibers and  $\text{Fe}_3\text{O}_4$ @PANI microspheres.

To further analyze the  $\text{Fe}_3\text{O}_4$ @PANI nanofibers and  $\text{Fe}_3\text{O}_4$ @PANI microspheres, XPS spectra was employed to understand the composition of their surface. In figure 4, for  $\text{Fe}_3\text{O}_4$ @PANI nanofibers and  $\text{Fe}_3\text{O}_4$ @PANI microspheres, it is clear that the main content of their surface is C, O, N elements. The binding energy of Fe2p is not obvious, which further supports that the  $\text{Fe}_3\text{O}_4$  microspheres are confined within a shell of PANI coating shell, in accordance with the TEM images.
